# Supplementary material for: Evaluating the relationship between the proportion of X-chromosome deletions and clinical manifestations in children with turner syndrome
Source: PubMed Central journal article supplement (PMC10933015; doi:10.3389/fendo.2024.1324160), 2024-02-28

**Green represents the X chromosome centromere site**

**Red represents the Y chromosome centromere site**

1. Sex chromosomes are XO

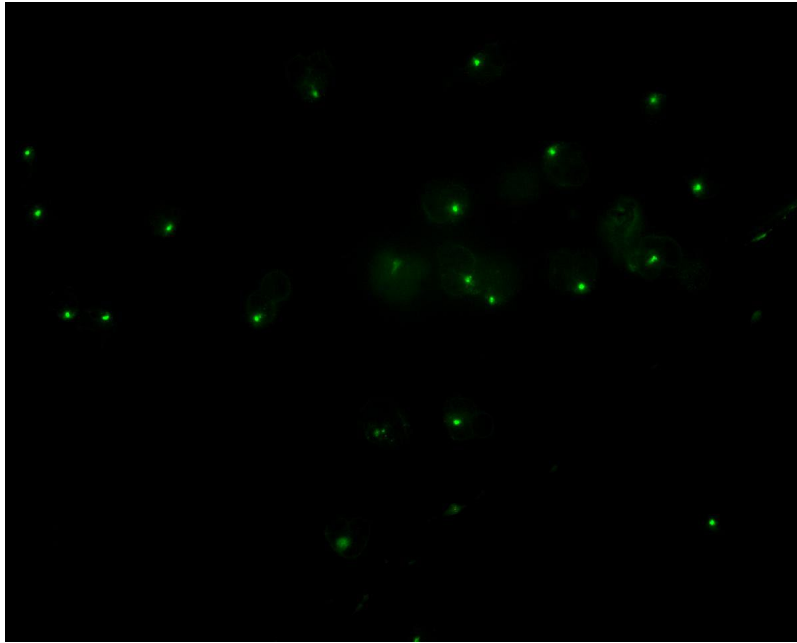

2. Sex chromosomes are X/XO

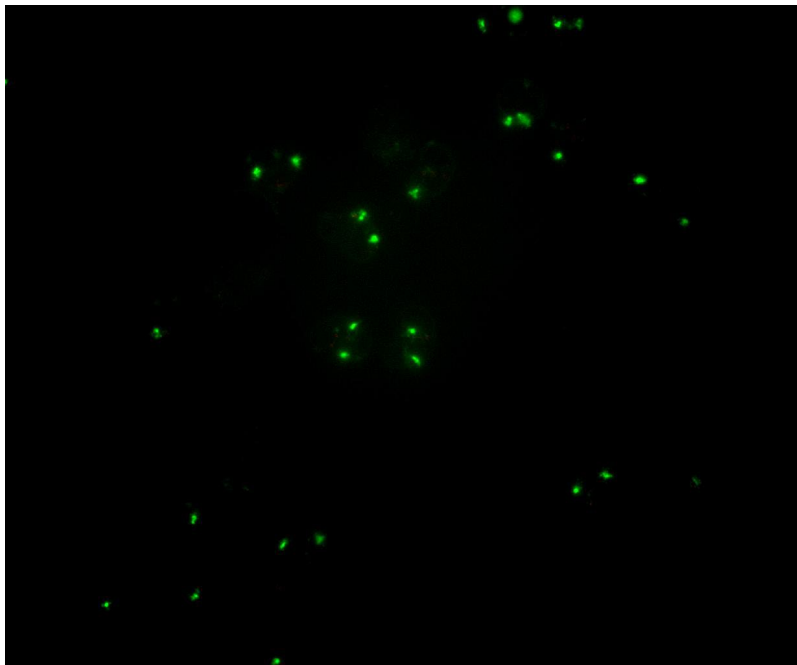

3. Sex chromosomes are X/XX/XXX

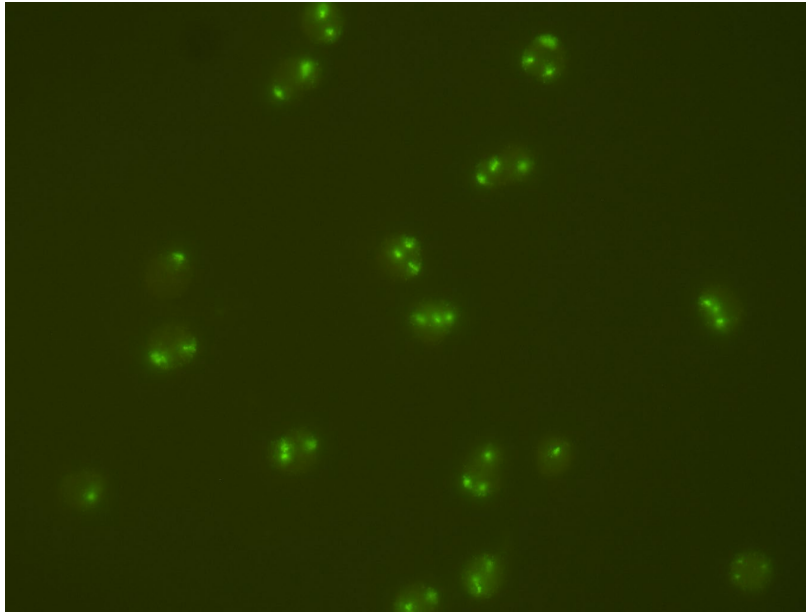

4. Sex chromosomes are X/XXX

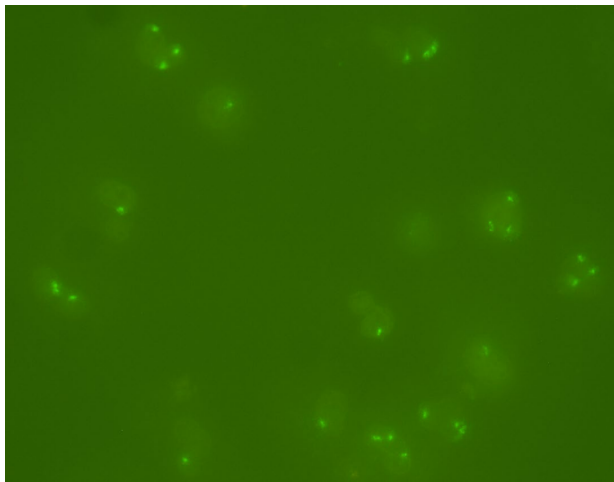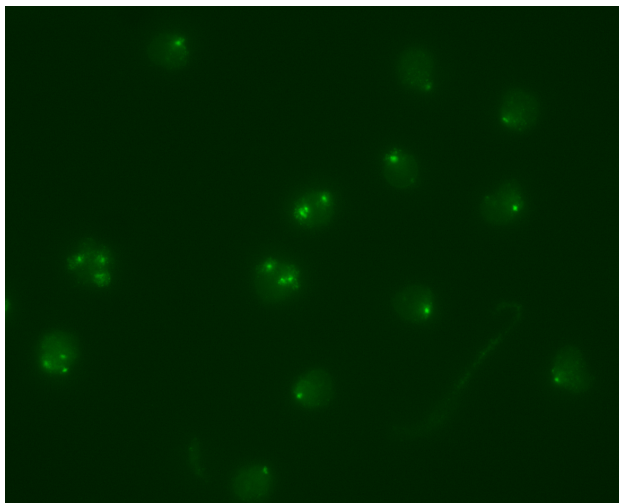

5. Sex chromosomes are X/XY

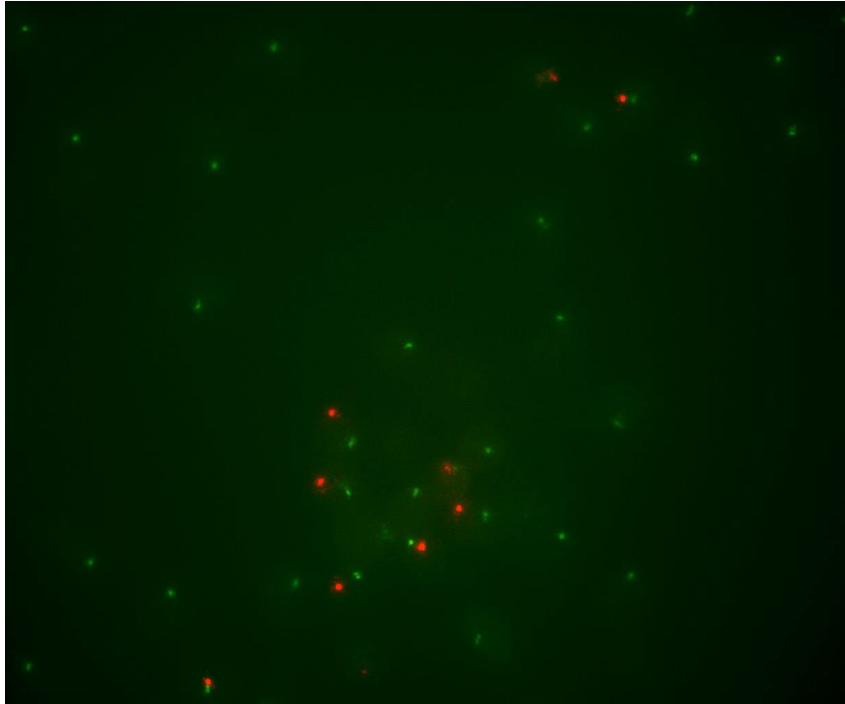

6. Sex chromosomes are X/XY/XYY

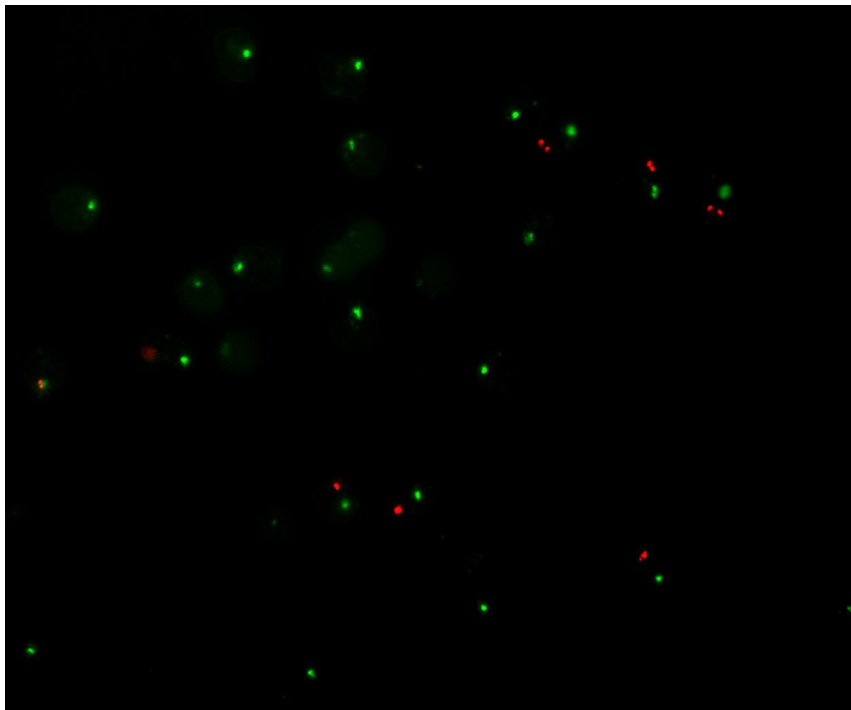

Supplement: Image_1.pdf [file Image_1.pdf]
